# Supplementary material for: Molecular evidence for sex reversal in wild populations of green frogs (Rana clamitans)
Source: PeerJ. 2019 Feb 8;7:e6449. doi: 10.7717/peerj.6449 (PMC6369831; doi:10.7717/peerj.6449)
Supplement: Supplemental Information 5 — Green frog pond landscape attributes, sample sizes for each sex, intersex frequencies, and ovarian stage frequencies. [file peerj-07-6449-s005.xlsx]

## Sheet: Sheet1
Table S1. Green frog pond landscape attributes, sample sizes for each sex, intersex frequencies, and ovarian stage frequencies
Pond	Town	Percent Forest	Percent Suburban	Males	Percent Intersexa	Females	Ovulating Ovariesb	Gravid Ovariesc	Immature Ovariesd	Spent Ovariese	Total Frogs
Laur02	Avon	46.3	53.7	12	0	8	5	0	2	1	20
Septic7	Madison	51.5	48.5	28	9.09091	9	1	7	0	1	37
Septic3	Madison	59	41	7	0	4	3	0	0	1	11
Sewer3	Trumbull	63.4	36.6	19	5.26316	12	4	8	0	0	31
AV68	Avon	63.7	36.3	20	0	4	0	4	0	0	24
Septic10	Orange	64.9	35.1	8	0	5	2	3	0	0	13
Laur01	Avon	65.7	34.3	20	20	3	1	2	0	0	23
AV08	Avon	66.7	33.3	4	25	2	0	2	0	0	6
OAHI	Woodbridge	83.2	16.8	9	44.4	3	1	1	0	1	12
EMSN	Madison	87.9	12.1	43	13.6364	7	3	2	0	2	50
WNHL	Madison	89.1	10.9	13	8.33333	13	2	8	2	1	26
SUHL	Madison	96	4	10	0	7	1	4	2	0	17
Forest2	Bethany	100	0	29	4.5	15	1	13	0	1	44
COAN	Durham	100	0	26	4.34783	15	5	8	0	2	41
Forest5	Meriden	100	0	75	19	17	5	11	0	1	92
Forest6	New Haven	100	0	13	7.69231	4	0	3	0	1	17
aThe percent of male histologically analyzed which exhibit testicular oocytes (TOs). Note, not all males were histologically analyzed.
bOvulating ovaries were flacid but contained many visible, immature eggs
cGravid ovaries filled the coelomic cavity and were filled with large, ripe eggs
dImmature ovaries were small, flacid, and yellow
eSpent ovaries were stretched, empty, and flacid, containing only a few remnant ripe eggs after recent oviposition
