# Supplementary material for: Molecular evidence for sex reversal in wild populations of green frogs (Rana clamitans)
Source: PeerJ. 2019 Feb 8;7:e6449. doi: 10.7717/peerj.6449 (PMC6369831; doi:10.7717/peerj.6449)
Supplement: Supplemental Information 7 — Bayesian binomial generalized linear model comparisons for female-to-male and male-to-female sex reversal as well as intersex frequencies. Only the two most sex-linked loci were used here. [file peerj-07-6449-s007.xlsx]

## Sheet: Sheet1
Table S3. Bayesian binomial generalized linear model comparisons for female-to-male and male-to-female sex reversal as well as intersex frequencies. Only the two most sex-linked loci were used here.
Model	WAICa	SEb	dWAICc	dSEd	Weighte
Female-to-Male Sex Reversal
Percent Suburban	59.1	14.15	0	NA	0.58
Intercept	59.8	14.3	0.6	3.7	0.42
Male-to-Female Sex Reversal
Intercept	92.1	21.88	0	NA	0.65
Percent Suburban	93.4	22.01	1.3	0.85	0.35
Intersex
Intercept	138.9	20.52	0	NA	0.63
Percent Suburban	139.9	20.45	1	1.2	0.37
aSmaller values support better model fits. Models are ranked from lowest to highest WAIC.
bEach WAIC estimate's standard error
cRelative differences between a model and model with the best (lowest) WAIC
dStandard error of dWAIC estimates or the standard error of the difference between a given mode's WAIC and the model with the best (lowest) WAIC.
eRepresent Akaike weights for each model. Weights across model sum to 1. Larger values indicate models with higher support and higher probabilities of predictive power conditoinal on all models considered
