# Supplementary material for: Molecular evidence for sex reversal in wild populations of green frogs (Rana clamitans)
Source: PeerJ. 2019 Feb 8;7:e6449. doi: 10.7717/peerj.6449 (PMC6369831; doi:10.7717/peerj.6449)
Supplement: Supplemental Information 8 — Forward and reverse primer details including primer length and sequence for five sex-linked markers of the green frog (Rana clamitans). [file peerj-07-6449-s008.xlsx]

## Sheet: Frog_oligos
Table S4. Primer sequences of single nucleotide polymorphsim (SNP) sex-linked markers
Marker	Primer	SNP	Bases	Oligo Sequence
RaclCT001	Forward	22:G>A	34	CGA TGG ATC CAG TGC CTG CAG CCA ACA TGT GTT T
	Reverse		41	CAA GCA GAA GAC GGC ATA CGA GAT CGG TGC ATG CTG AAC AA
RaclCT003	Forward	19:C>T	31	CGA TGG ATC CAG TGC CTG CAG ACA GTT GAT G
	Reverse		51	CAA GCA GAA GAC GGC ATA CGA GAT CGG TGC ATG CTG AAG GAC ACA GTG CGC
RaclCT005	Forward	45:G>A	54	CGA TGG ATC CAG TGC CTG CAG ACA AAC TCA TGC TGT GTC TAA TCA CAG CAC AGG
	Reverse		41	CAA GCA GAA GAC GGC ATA CGA GAT CGG TGC ATG CAC ATG CC
RaclCT007	Forward	11:C>A	23	CGA TGG ATC CAG TGC CTG CAG CT
	Reverse		64	CAA GCA GAA GAC GGC ATA CGA GAT CGG TGC ATG CTG TCA AGG ACA GGA CAC ACA GAG GCC GGA G
RaclCT009	Forward	16:C>T	28	CGA TGG ATC CAG TGC CTG CAG CTG GGT C
	Reverse		53	CAA GCA GAA GAC GGC ATA CGA GAT CGG TGC ATG CGA CGA TGA AGG ATC TTG TG
