# Supplementary material for: Molecular evidence for sex reversal in wild populations of green frogs (Rana clamitans)
Source: PeerJ. 2019 Feb 8;7:e6449. doi: 10.7717/peerj.6449 (PMC6369831; doi:10.7717/peerj.6449)
Supplement: Supplemental Information 9 — Observed combinations of genotypes at each of five sex-linked markers from frogs collected in 2016 as well as probabilities a frog is a given phenotypic sex given each combination. [file peerj-07-6449-s009.xlsx]

## Sheet: Sheet1
Table S5. Observed combinations of genotypes at each of five sex-linked markersa from frogs collected in 2016 as well as probabilities a frog is a given phenotypic sex given each combination
RaclCT001	RaclCT003	RaclCT005	RaclCT007	RaclCT009	Pr(Genotype | Female)	Pr(Genotype | Male)	Pr(Female | Genotype)	Pr(Male | Genotype)	Noteb
NA	XX	XX	XX	XX	0.83	0.02	0.932584	0.0674157	AlleleSequences
NA	XX	XY	XX	XX	0.04	0	1	0	AlleleSequences
NA	XY	XY	XY	XY	0	0.85	0	1	AlleleSequences
XX	NA	NA	NA	NA	1	0	1	0	AlleleSequences
XX	NA	NA	XX	XY	0.09	0	1	0	AlleleSequences
XX	NA	XX	XX	XX	0.04	0	1	0	AlleleSequences
XX	NA	XX	XX	XY	0.09	0	1	0	AlleleSequences
XX	XX	XX	XX	XX	0.83	0	1	0	AlleleSequences
XX	XX	XX	XX	XY	0.09	0	1	0	AlleleSequences
XX	XX	XY	XX	XX	0.09	0.02	0.6	0.4	AlleleSequences
XY	NA	NA	NA	NA	0	1	0	1	AlleleSequences
XY	NA	XY	XX	XY	0	0.04	0	1	AlleleSequences
XY	XX	XX	XX	XX	0	0.02	0	1	AlleleSequences
XY	XX	XY	XX	XY	0	0.04	0	1	AlleleSequences
XY	XY	XX	XY	XY	0	0.04	0	1	AlleleSequences
XY	XY	XY	XX	XX	0	0.02	0	1	AlleleSequences
XY	XY	XY	XY	XX	0	0.02	0	1	AlleleSequences
XY	XY	XY	XY	XY	0	0.85	0	1	AlleleSequences
NA	XY	XY	XX	XY	0	0.08	0	1	GenotypeProportions
XX	XX	XX	XY	XX	0.09	0.02	0.6	0.4	GenotypeProportions
XX	XX	XX	XY	XY	0.04	0	1	0	GenotypeProportions
XX	XY	XX	XX	XX	0.09	0.02	0.6	0.4	GenotypeProportions
XX	XY	XX	XX	XY	0.04	0	1	0	GenotypeProportions
XX	XY	XY	XX	XX	0.04	0	1	0	GenotypeProportions
XY	XX	XX	XX	XY	0.04	0	1	0	GenotypeProportions
XY	XX	XX	XY	XY	0	0.06	0	1	GenotypeProportions
XY	XX	XY	XX	XX	0.04	0	1	0	GenotypeProportions
XY	XX	XY	XY	XY	0	0.08	0	1	GenotypeProportions
XY	XY	XX	XX	XX	0.04	0	1	0	GenotypeProportions
XY	XY	XX	XX	XY	0	0.06	0	1	GenotypeProportions
XY	XY	XY	XX	XY	0	0.08	0	1	GenotypeProportions
aAn XX genotype refers to an individual that is homozygous for the most common allele whereas an XY genotype is an individual heterozygous for the common and SNP alleles
bGenotypic sex probability that are based on Allele Sequences from Lambert et al. (2016)19, whereas Genotype Proportions refers to probabilities based on the number of markers that are either XX or XY for a given individual
