# Supplementary material for: Molecular evidence for sex reversal in wild populations of green frogs (Rana clamitans)
Source: PeerJ. 2019 Feb 8;7:e6449. doi: 10.7717/peerj.6449 (PMC6369831; doi:10.7717/peerj.6449)
Supplement: Supplemental Information 10 — Observed combinations of genotypes at each of five sex-linked markers from frogs collected in 2016 as well as probabilities a frog is a given phenotypic sex given each combination. [file peerj-07-6449-s010.xlsx]

## Sheet: Sheet1
Table S6 | Observed combinations of genotypes at each of five sex-linked markersa from frogs collected in 2016 as well as probabilities a frog is a given phenotypic sex given each combination
RaclCT001	RaclCT003	Pr(Genotype | Female)	Pr(Genotype | Male)	Pr(Female | Genotype)	Pr(Male | Genotype)
XX	XX	1	0	1	0
XY	XX	0	0.06	0	1
XY	XY	0	0.94	0	1
aAn XX genotype refers to an individual that is homozygous for the most common allele whereas an XY genotype is an individual heterozygous for the common and SNP alleles
